# Supplementary material for: Monodentate coordination of N-[di(phenyl/ethyl)carbamothioyl]benzamide ligands: synthesis, crystal structure and catalytic oxidation property of Cu(i) complexes
Source: Royal Society of Chemistry journal article supplement (doi:10.1039/c1dt10628g), 2011-01-01
Supplement: c1dt10628g.pdf [file c1dt10628g.pdf]

## I. Representative spectra

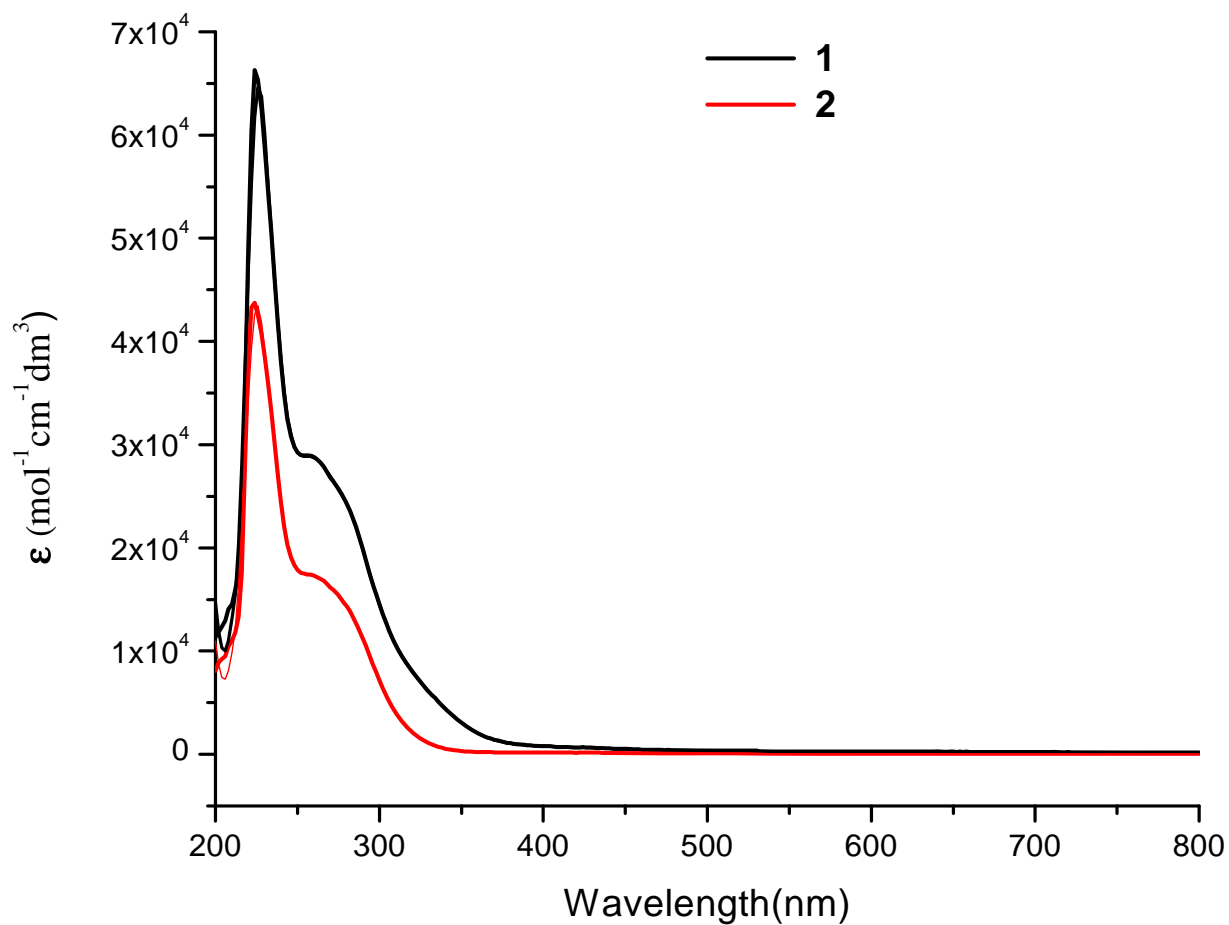

**Fig. S1** UV- VIS spectra of **1** and **2**

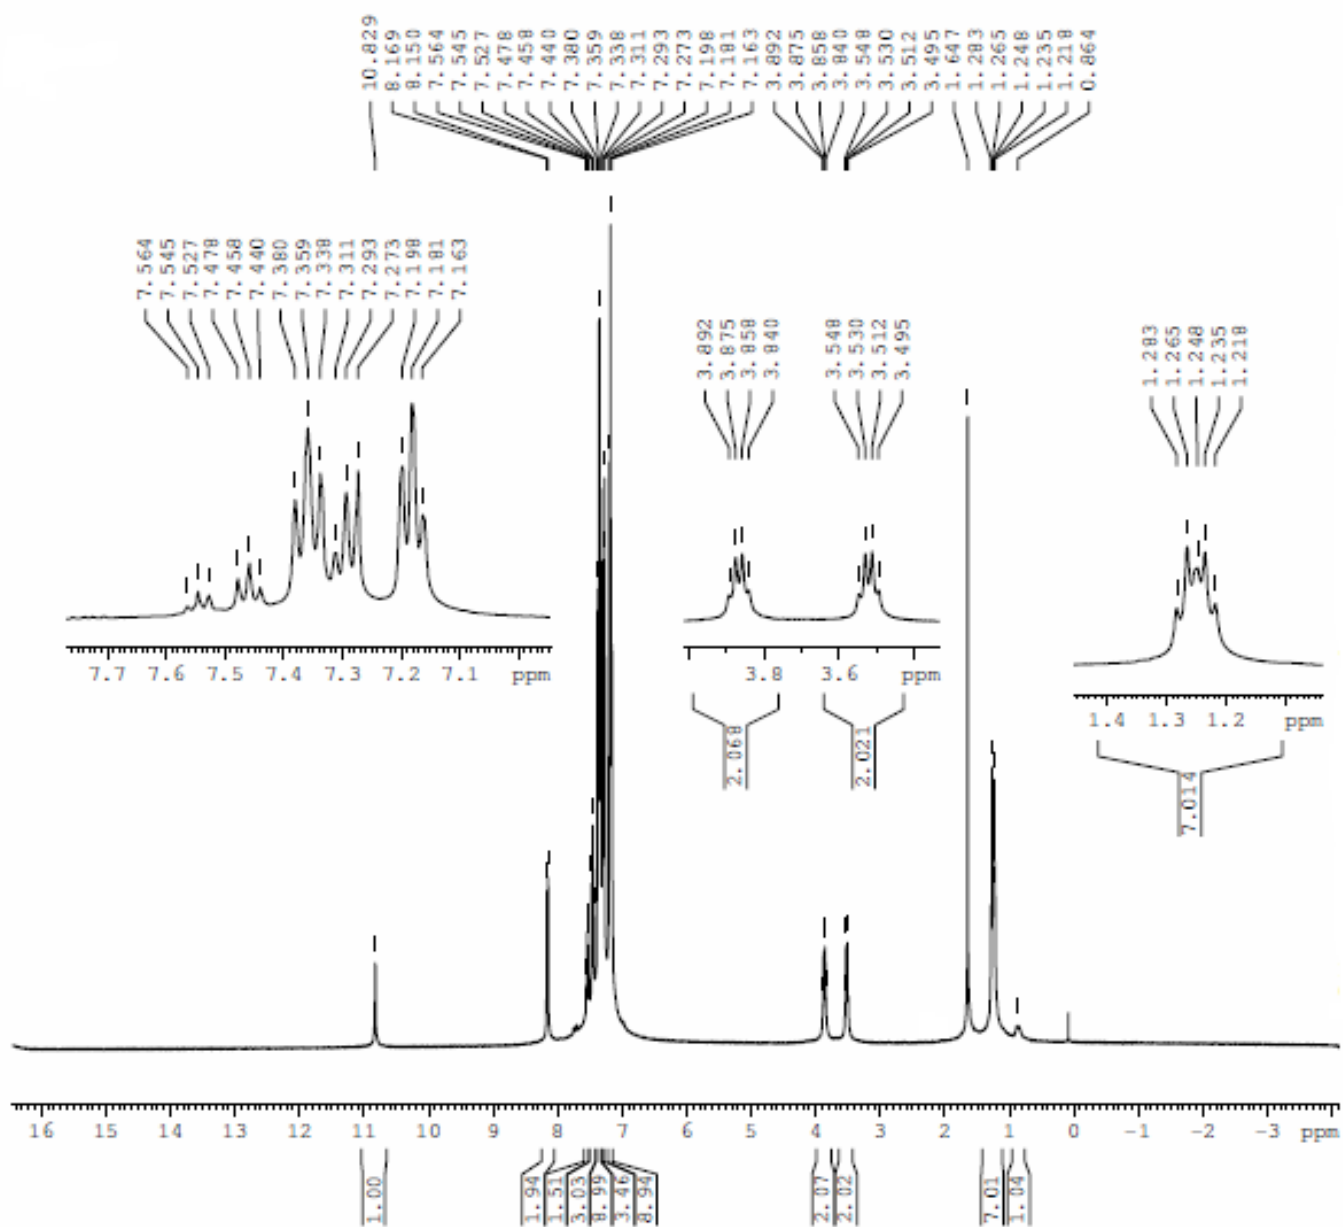

**Fig. S2**  $^1\text{H}$  NMR spectrum of **2**

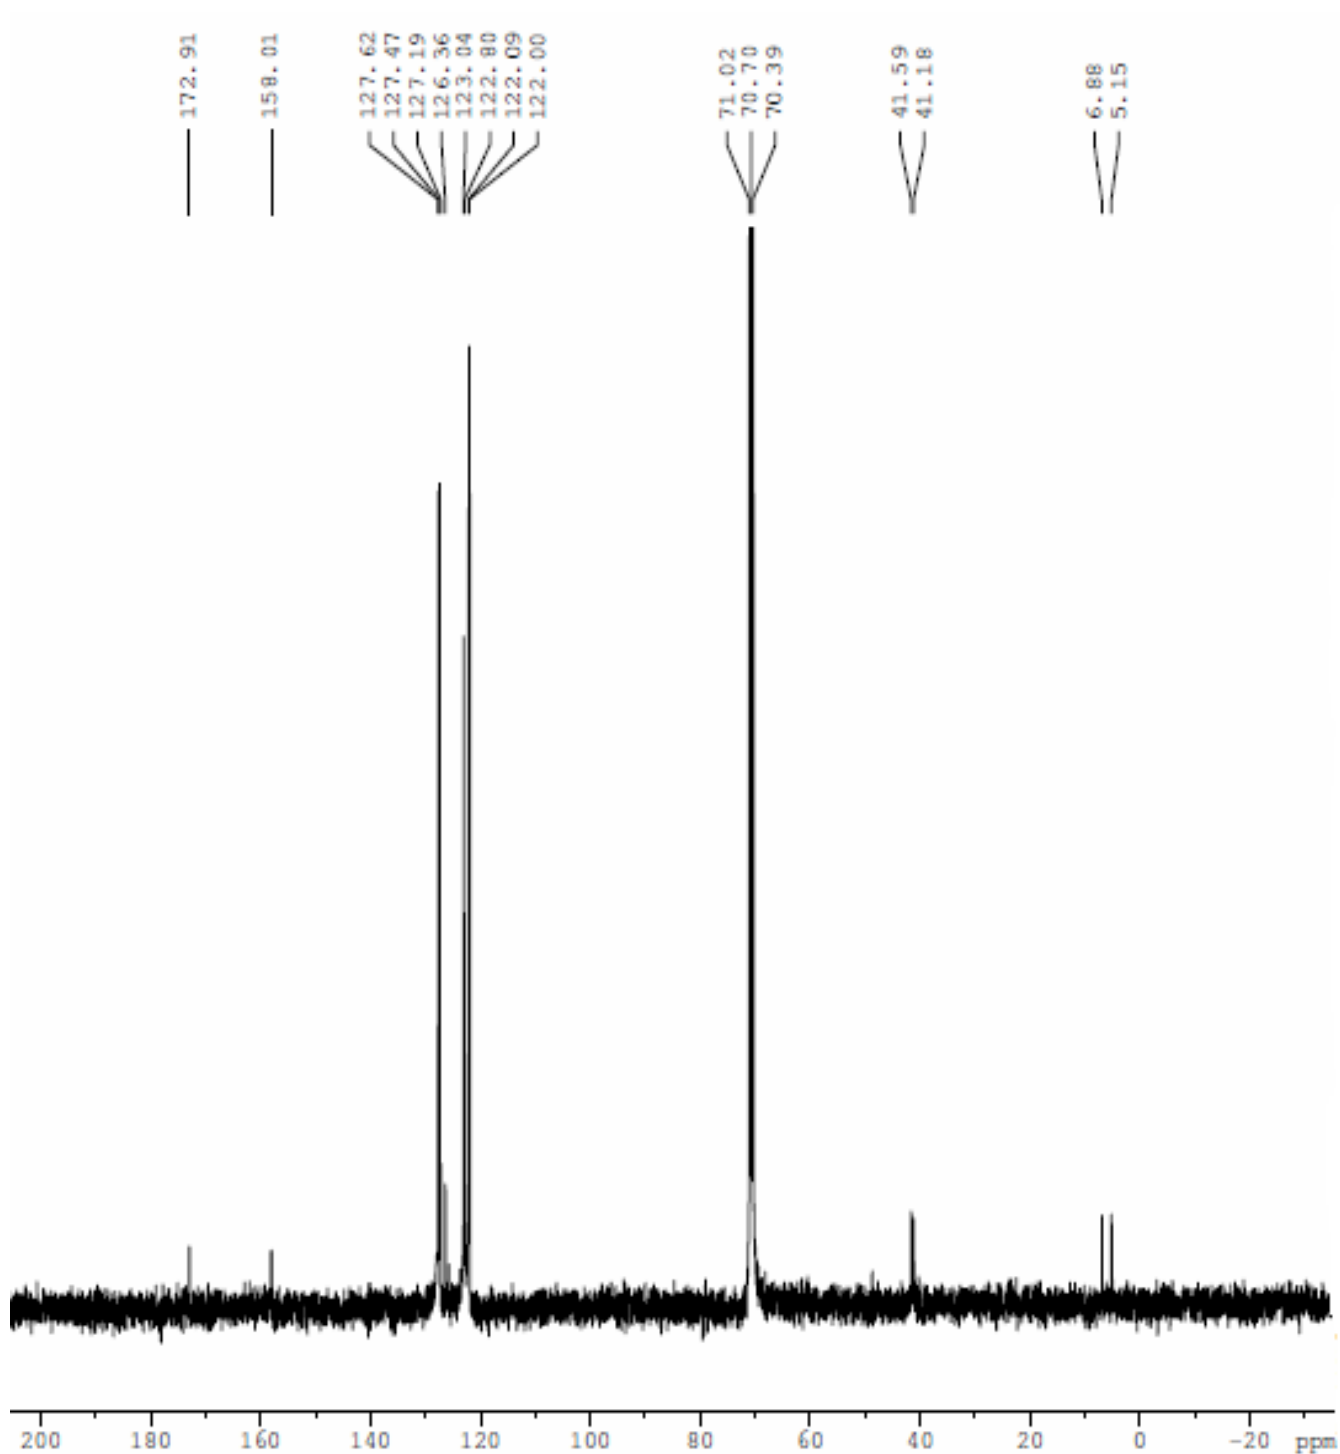

Fig. S3  $^{13}\text{C}$  NMR spectrum of **2**

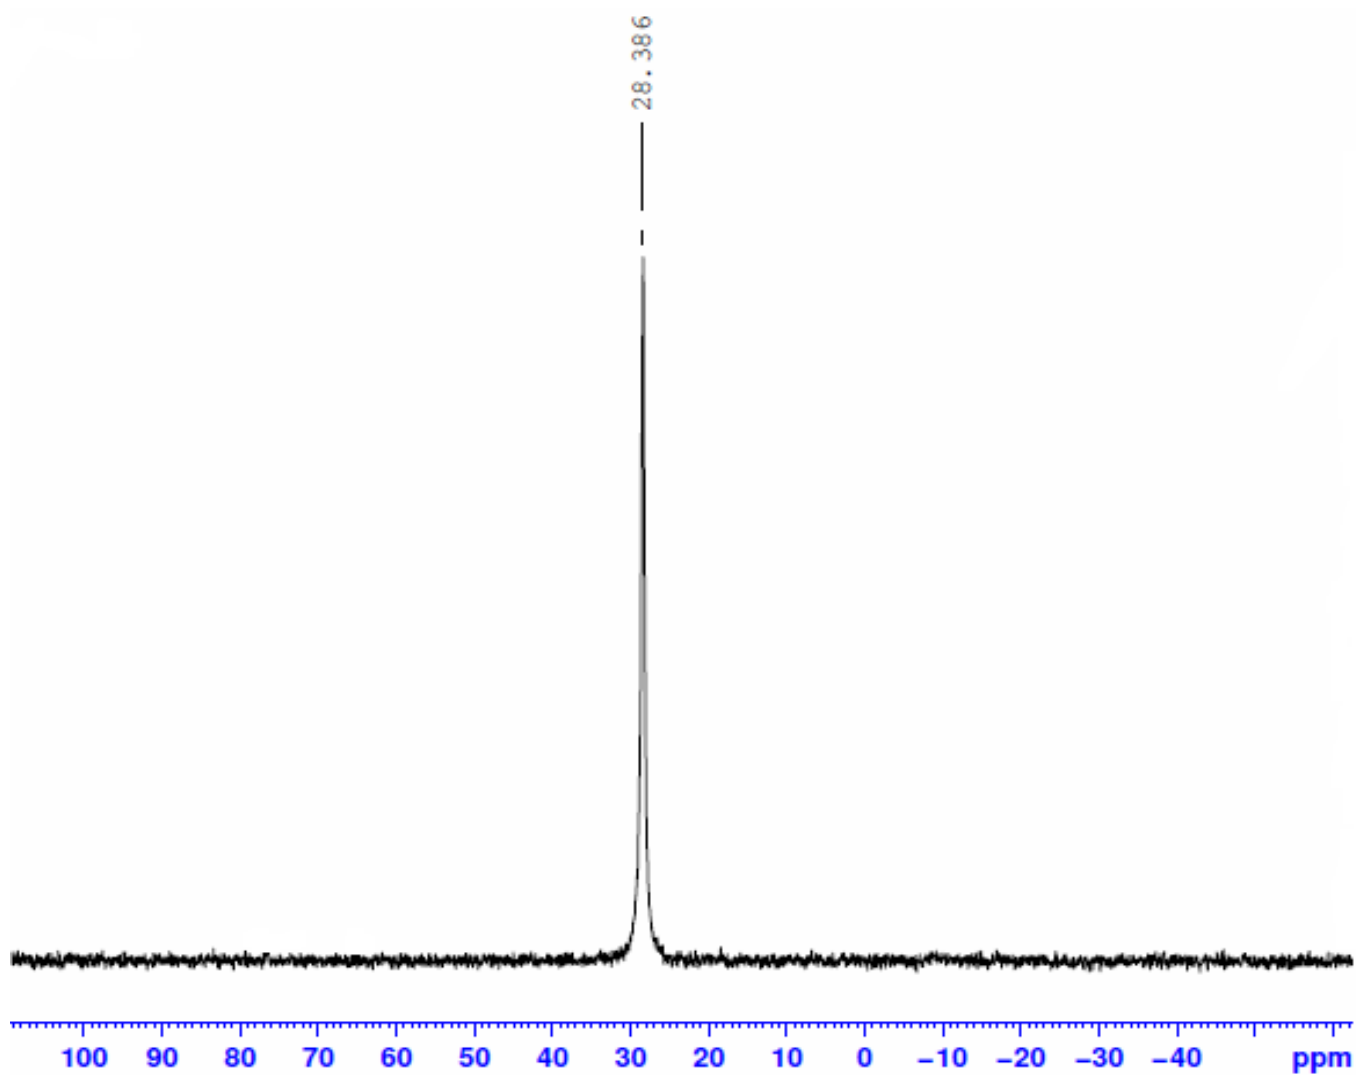

**Fig. S4**  $^{31}\text{P}$  NMR spectrum of **2**

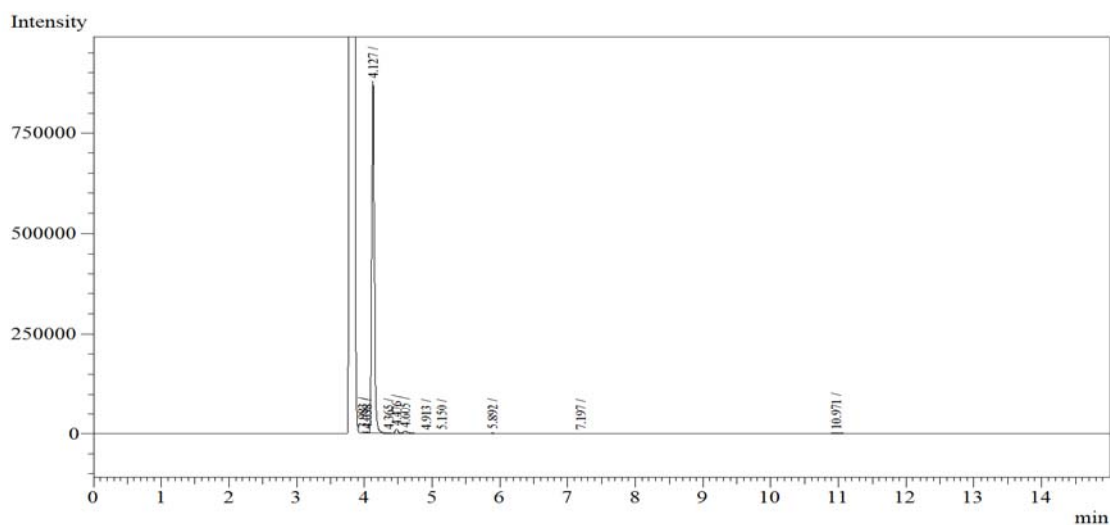

| Peak#        | Ret.Time | Area           | Height        | Conc.  |
|--------------|----------|----------------|---------------|--------|
| 1            | 3.983    | 9256           | 4269          | 0.369  |
| 2            | 4.038    | 5646           | 2612          | 0.225  |
| 3            | 4.127    | 2376423        | 870562        | 94.817 |
| 4            | 4.365    | 3965           | 1317          | 0.158  |
| 5            | 4.476    | 29374          | 10642         | 1.172  |
| 6            | 4.605    | 29285          | 5955          | 1.168  |
| 7            | 4.913    | 4092           | 726           | 0.163  |
| 8            | 5.150    | 1307           | 250           | 0.052  |
| 9            | 5.892    | 8451           | 2252          | 0.337  |
| 10           | 7.197    | 1962           | 289           | 0.078  |
| 11           | 10.971   | 36563          | 1932          | 1.459  |
| <b>Total</b> |          | <b>2506324</b> | <b>900806</b> |        |

**Fig. S5** GC Chromatogram for entry 1 in **Table 5**

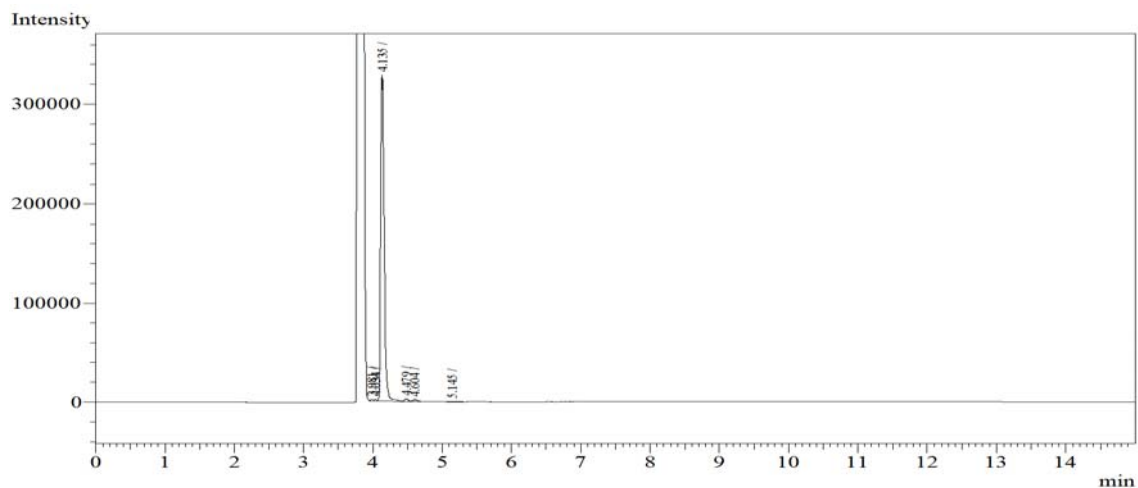

| Peak#        | Ret.Time | Area           | Height        | Conc.  |
|--------------|----------|----------------|---------------|--------|
| 1            | 3.981    | 4192           | 1778          | 0.345  |
| 2            | 4.034    | 3198           | 1636          | 0.263  |
| 3            | 4.135    | 1187484        | 326231        | 97.830 |
| 4            | 4.479    | 8969           | 2513          | 0.739  |
| 5            | 4.604    | 8836           | 1711          | 0.728  |
| 6            | 5.145    | 1150           | 153           | 0.095  |
| <b>Total</b> |          | <b>1213829</b> | <b>334022</b> |        |

**Fig. S6** GC Chromatogram for entry 2 in **Table 5** and entry 3 in **Table 6**

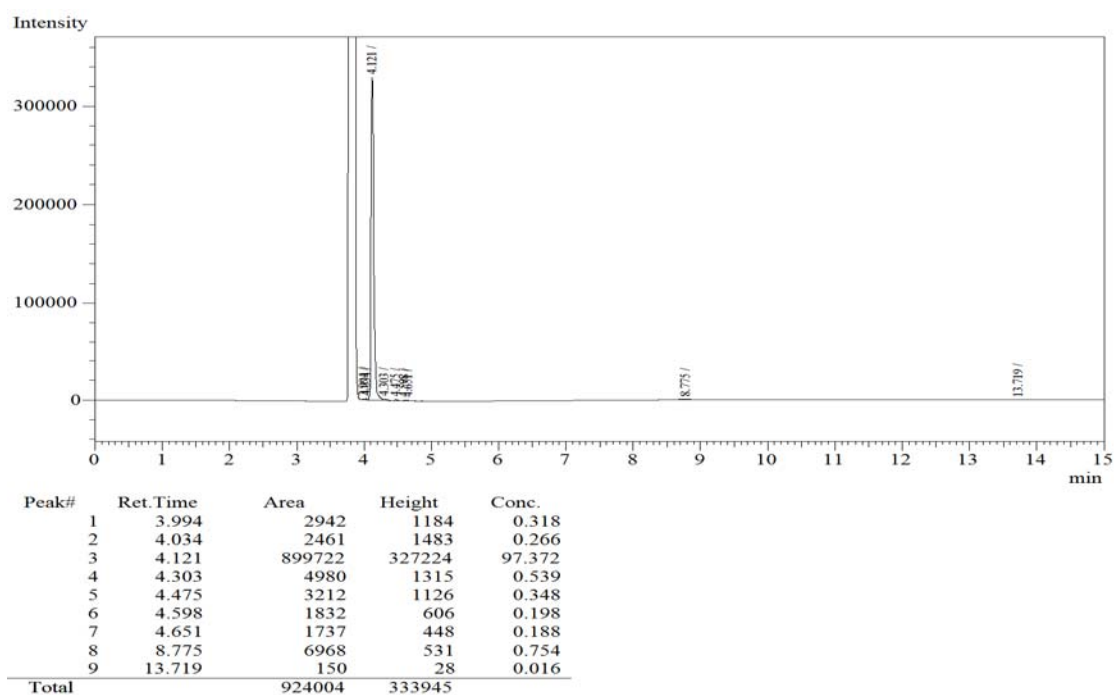

**Fig. S7** GC Chromatogram for entry 3 in **Table 5**

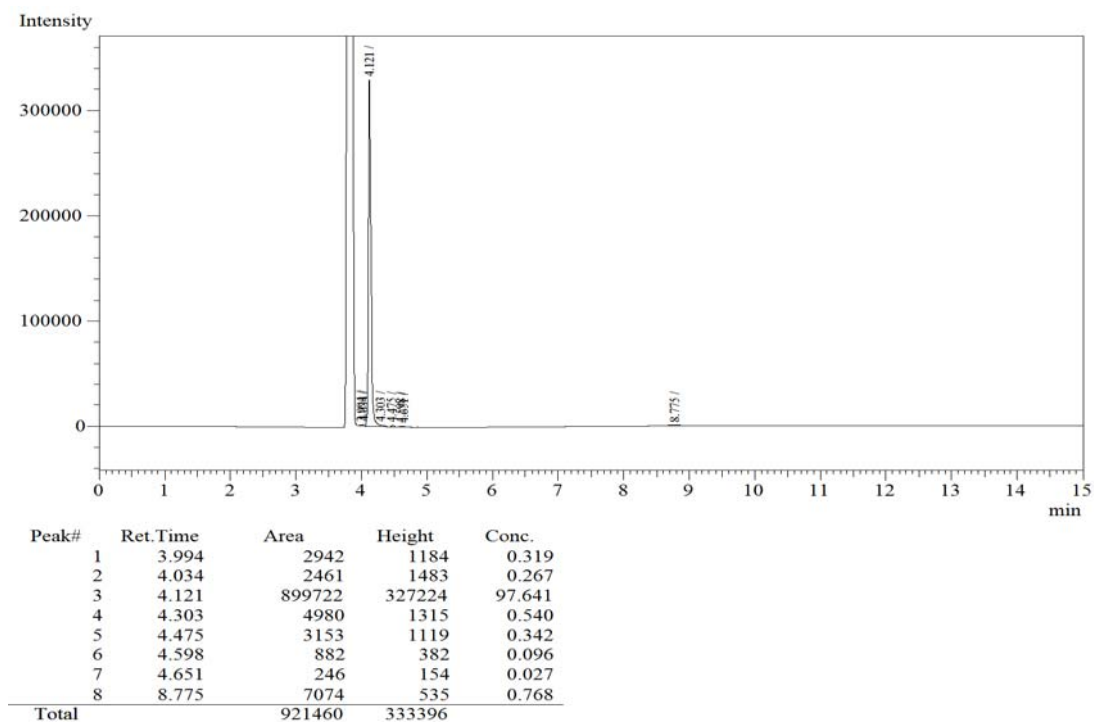

**Fig. S8** GC Chromatogram for entry 4 in **Table 5**

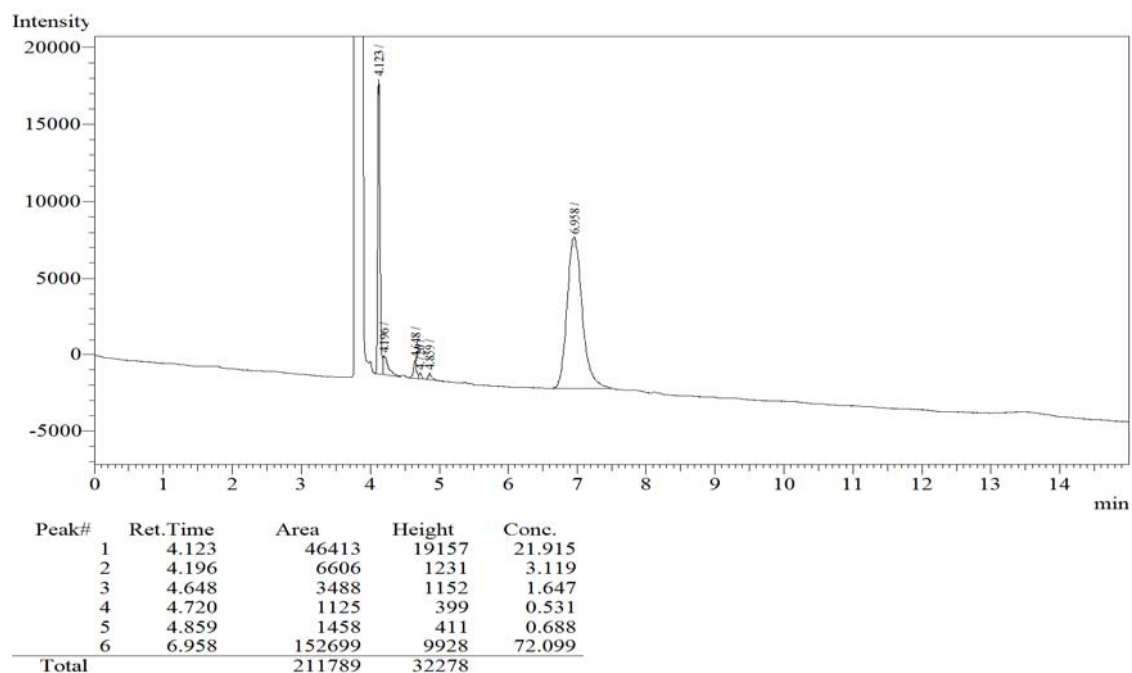

**Fig. S9** GC Chromatogram for entry 5 in **Table 5**

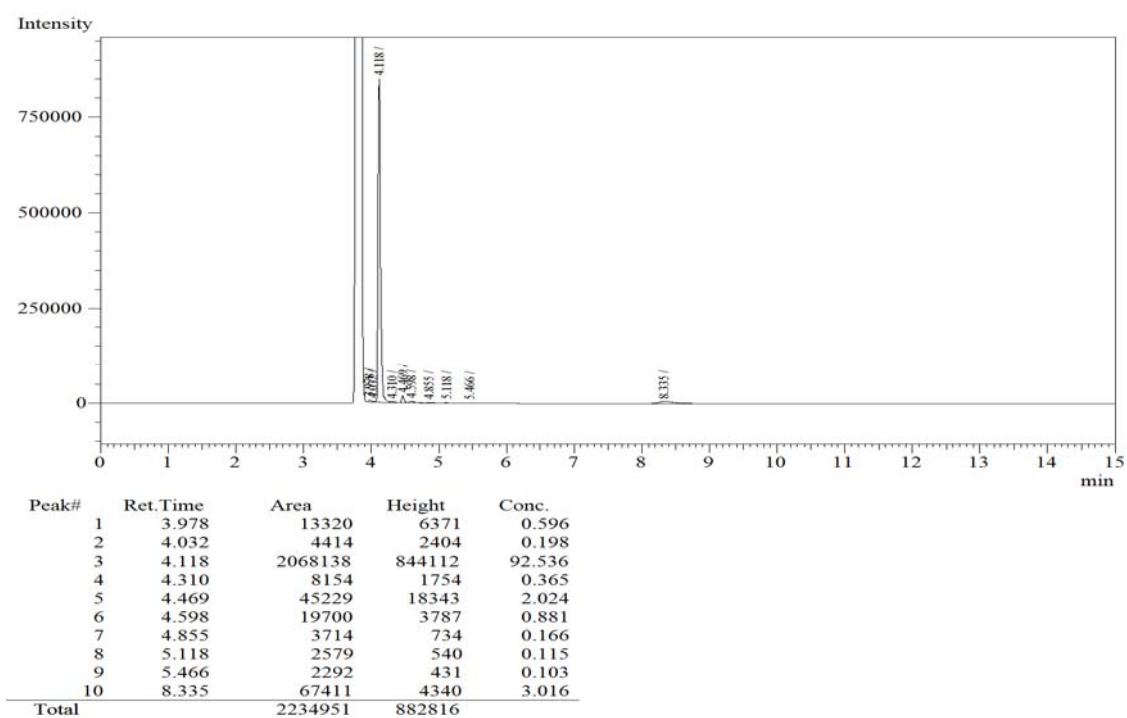

**Fig. S10** GC Chromatogram for entry 6 in **Table 5**

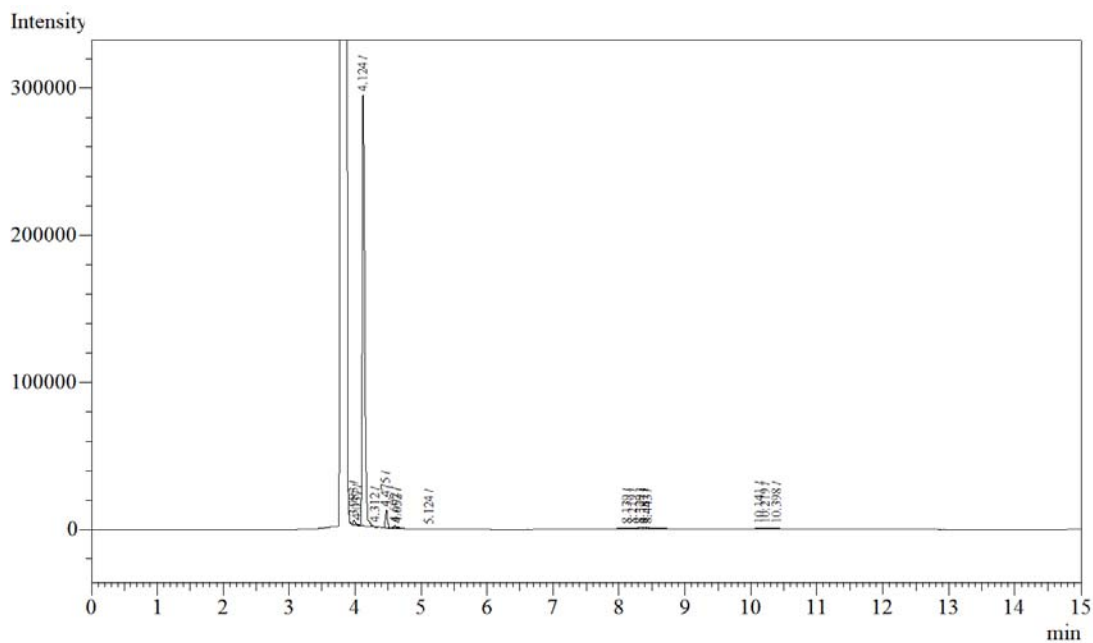

| Peak#        | Ret. Time | Area          | Height        | Conc.  |
|--------------|-----------|---------------|---------------|--------|
| 1            | 3.983     | 5760          | 2953          | 0.683  |
| 2            | 4.037     | 1035          | 676           | 0.123  |
| 3            | 4.124     | 754969        | 291583        | 89.568 |
| 4            | 4.312     | 1572          | 629           | 0.186  |
| 5            | 4.475     | 25868         | 11674         | 3.069  |
| 6            | 4.602     | 4086          | 1486          | 0.485  |
| 7            | 4.652     | 2229          | 942           | 0.264  |
| 8            | 5.124     | 2004          | 443           | 0.238  |
| 9            | 8.139     | 4378          | 490           | 0.519  |
| 10           | 8.219     | 3009          | 605           | 0.357  |
| 11           | 8.329     | 4044          | 696           | 0.480  |
| 12           | 8.387     | 2269          | 693           | 0.269  |
| 13           | 8.443     | 12444         | 693           | 1.476  |
| 14           | 10.141    | 10068         | 555           | 1.194  |
| 15           | 10.219    | 4720          | 584           | 0.560  |
| 16           | 10.398    | 4447          | 438           | 0.528  |
| <b>Total</b> |           | <b>842902</b> | <b>315140</b> |        |

**Fig. S11** GC Chromatogram for entry 7 in **Table 5**



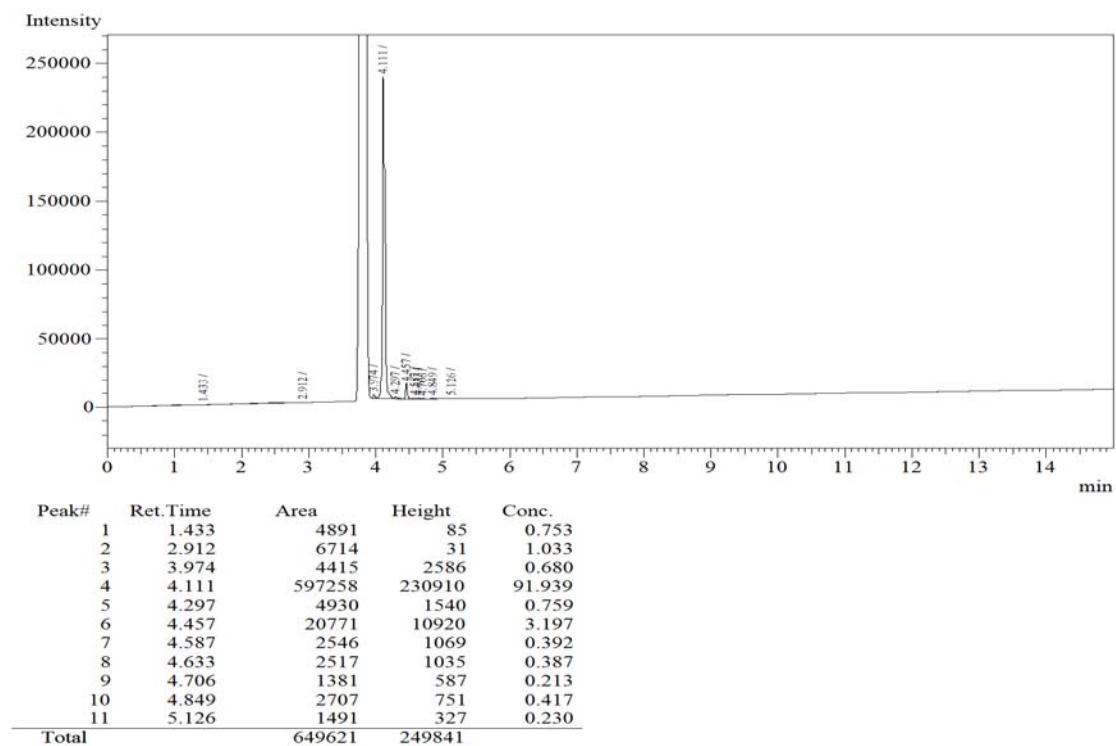

**Fig. S12** GC Chromatogram for entry 8 in **Table 5**

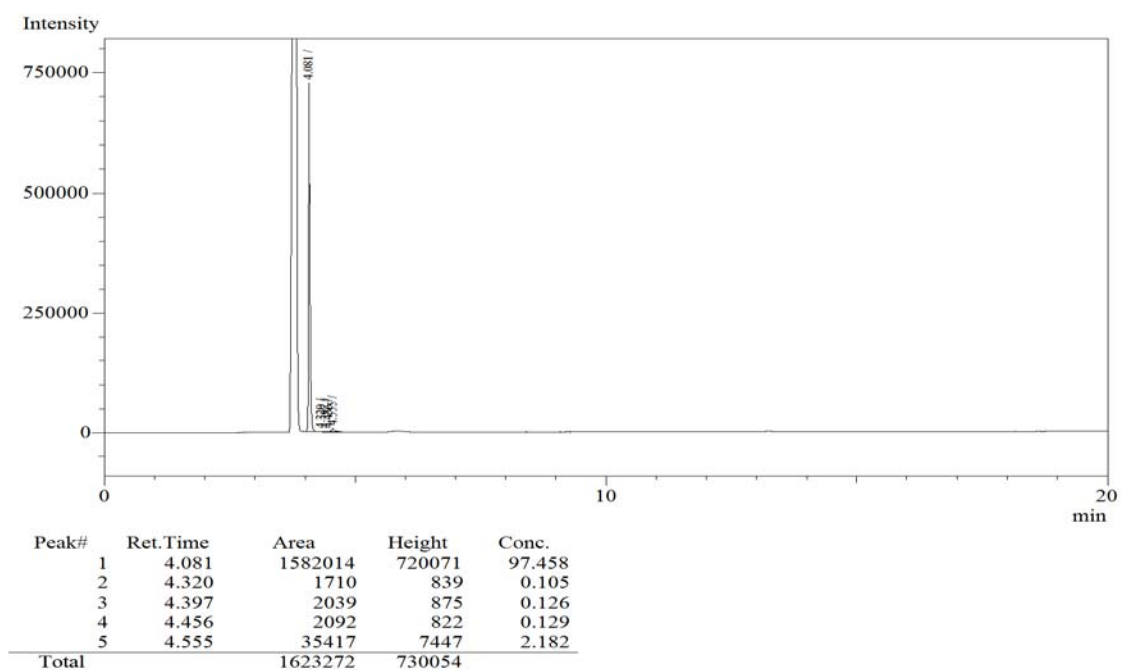

**Fig. S13** GC Chromatogram for entry 9 in **Table 5**

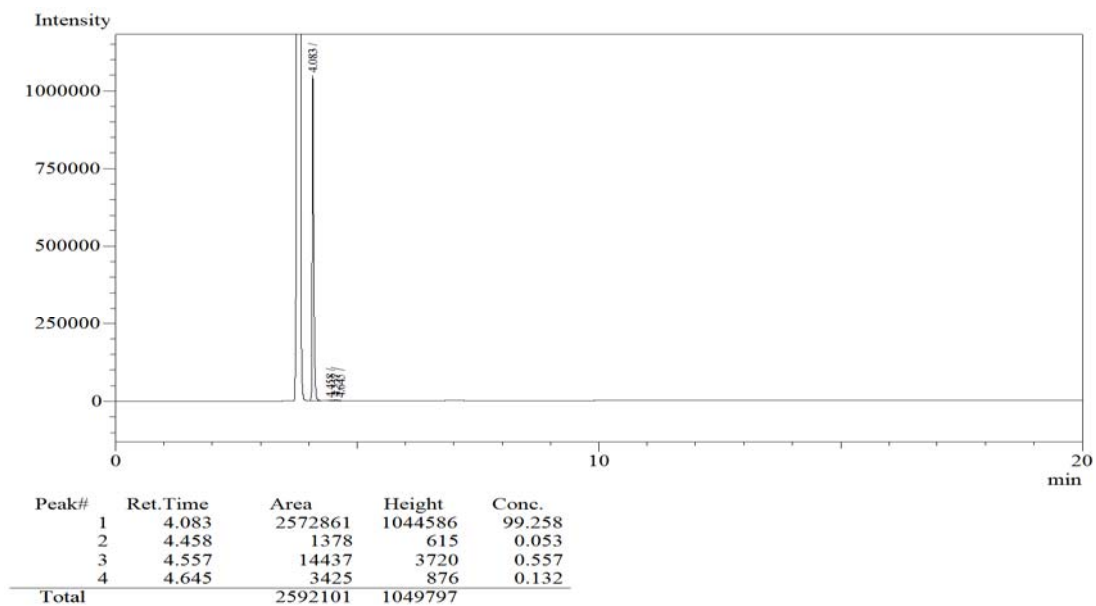

**Fig. S14** GC Chromatogram for entry 10 in **Table 5**

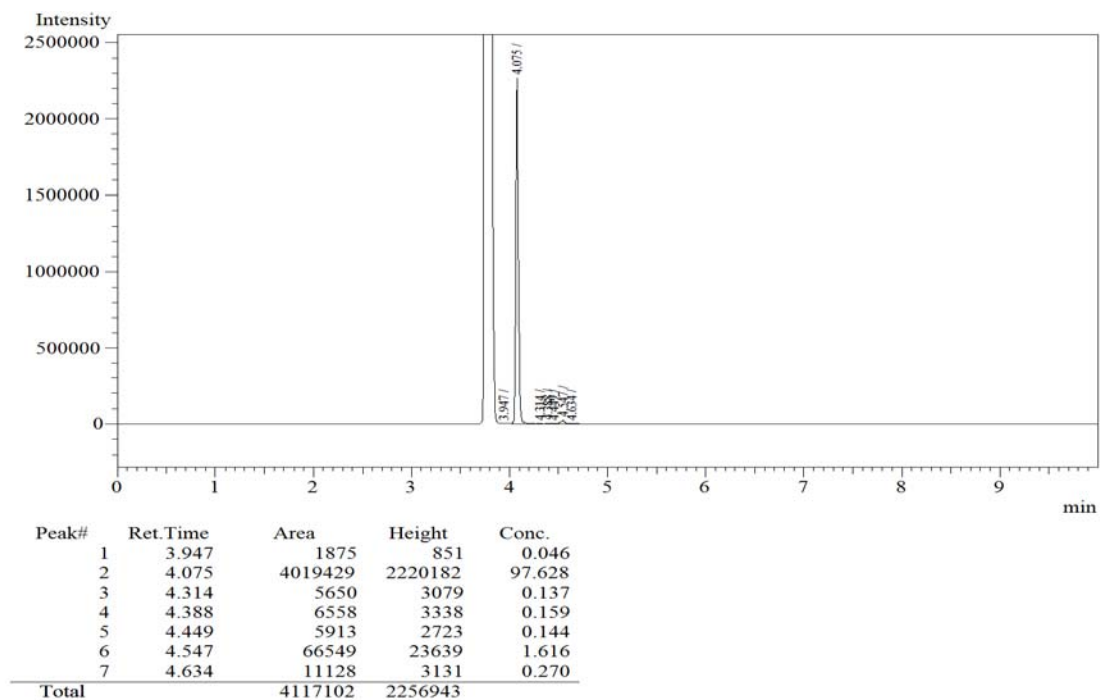

**Fig. S15** GC Chromatogram for entry 11 in **Table 5**

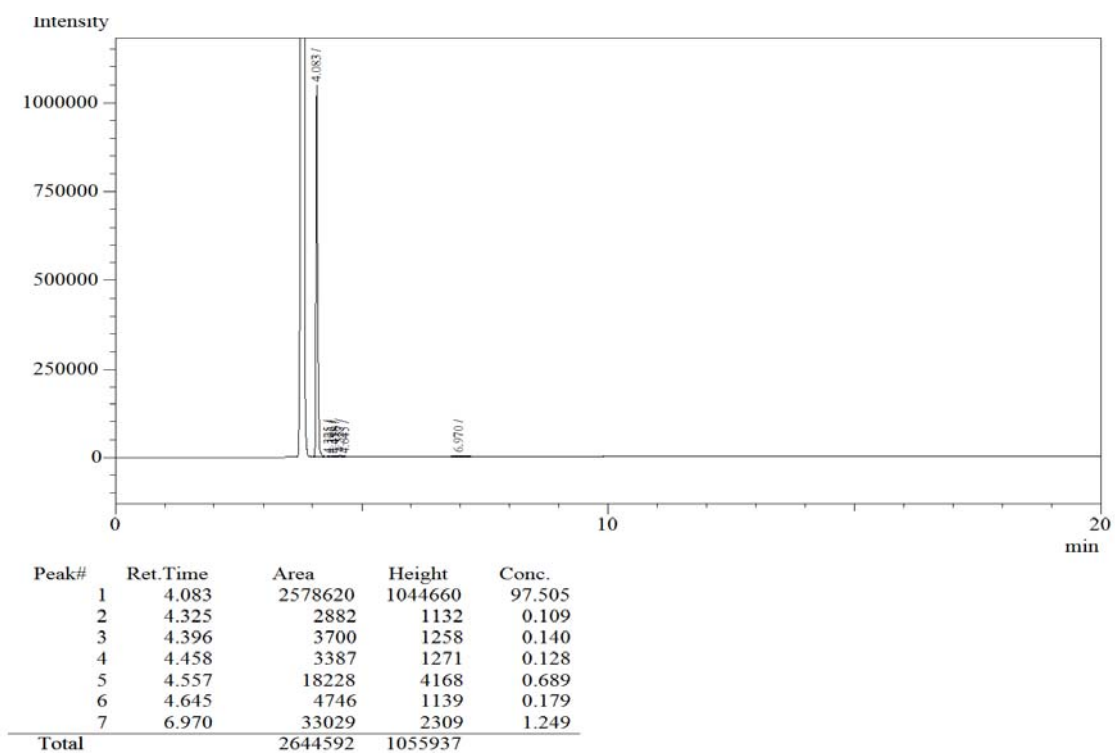

**Fig. S16** GC Chromatogram for entry 12 in **Table 5**

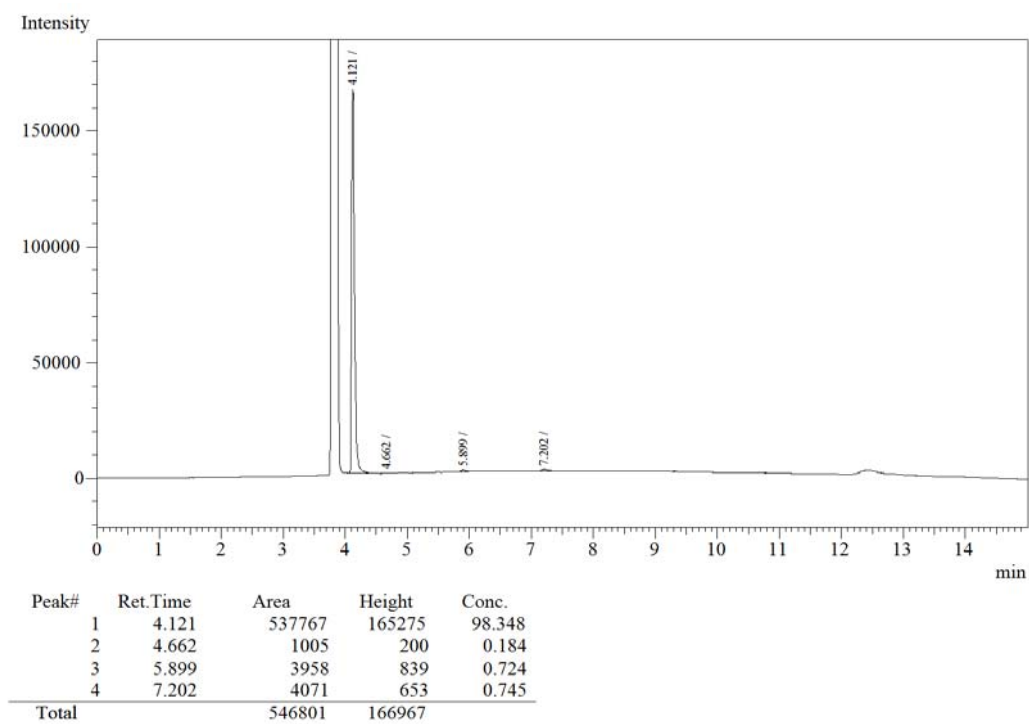

**Fig. S17** GC Chromatogram for entry 13 in **Table 5**

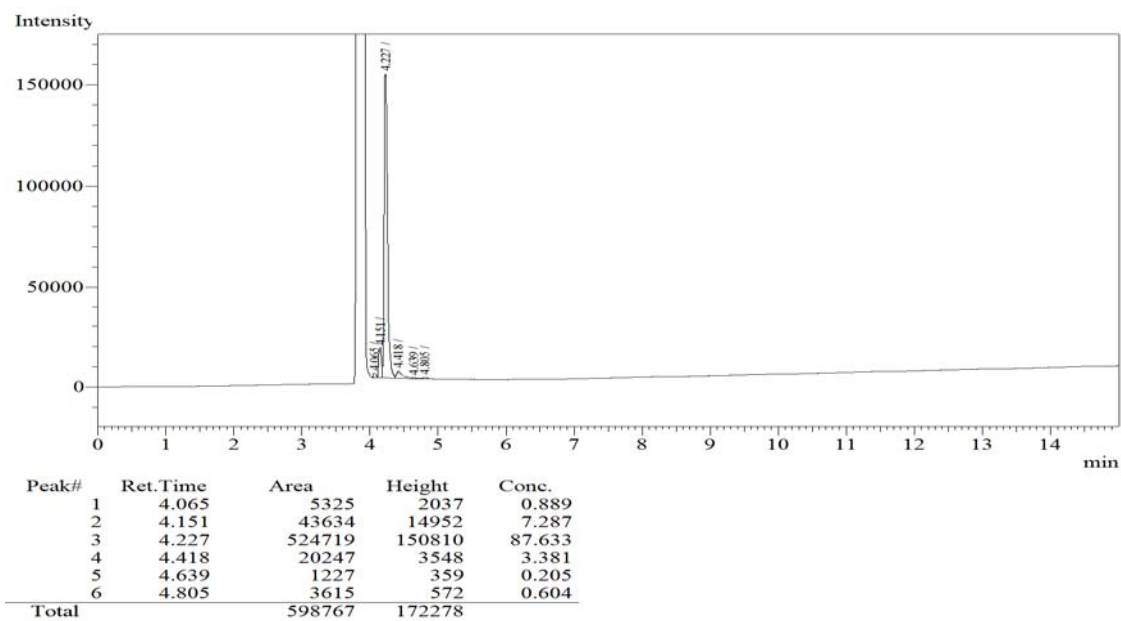

**Fig. S13** GC Chromatogram for entry 1 in **Table 6**

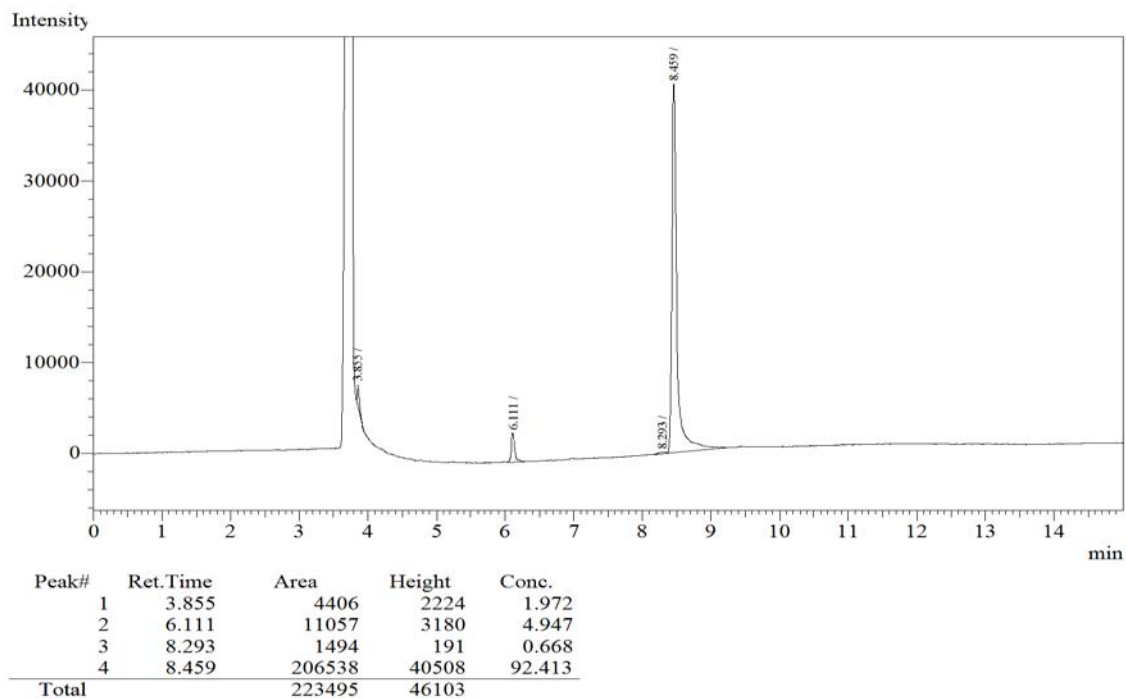

**Fig. S14** GC Chromatogram for entry 2 in **Table 6**

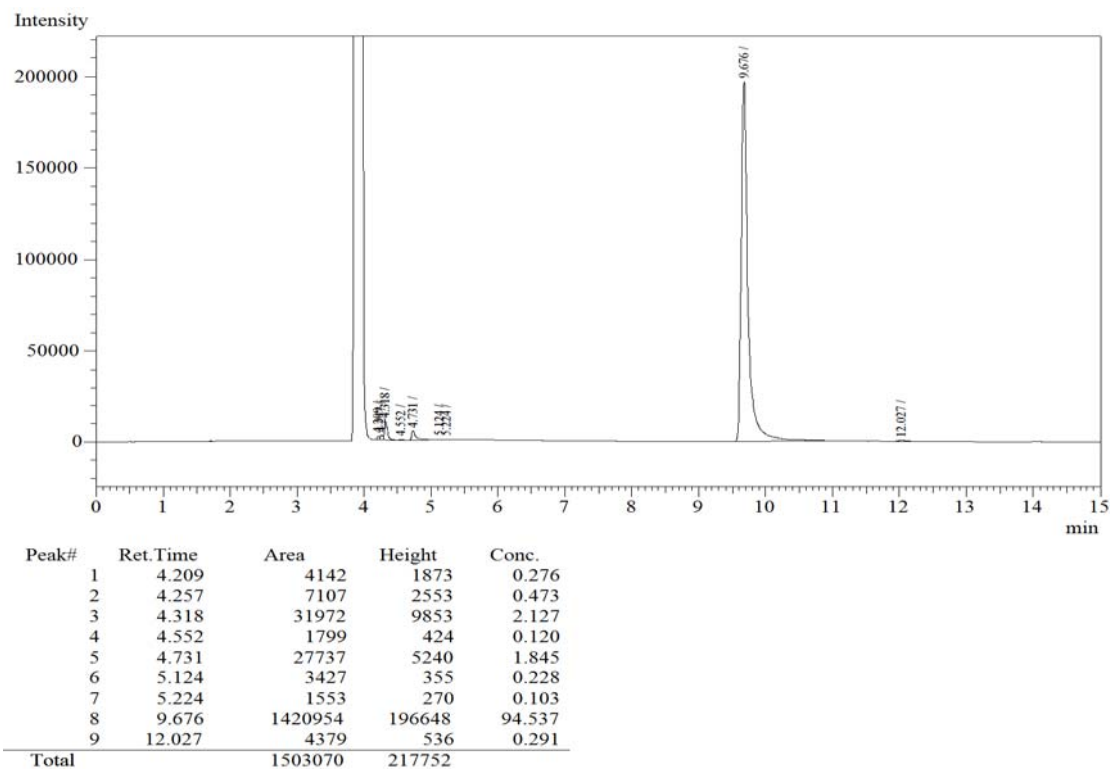

**Fig. S15** GC Chromatogram for entry 5 in **Table 6**

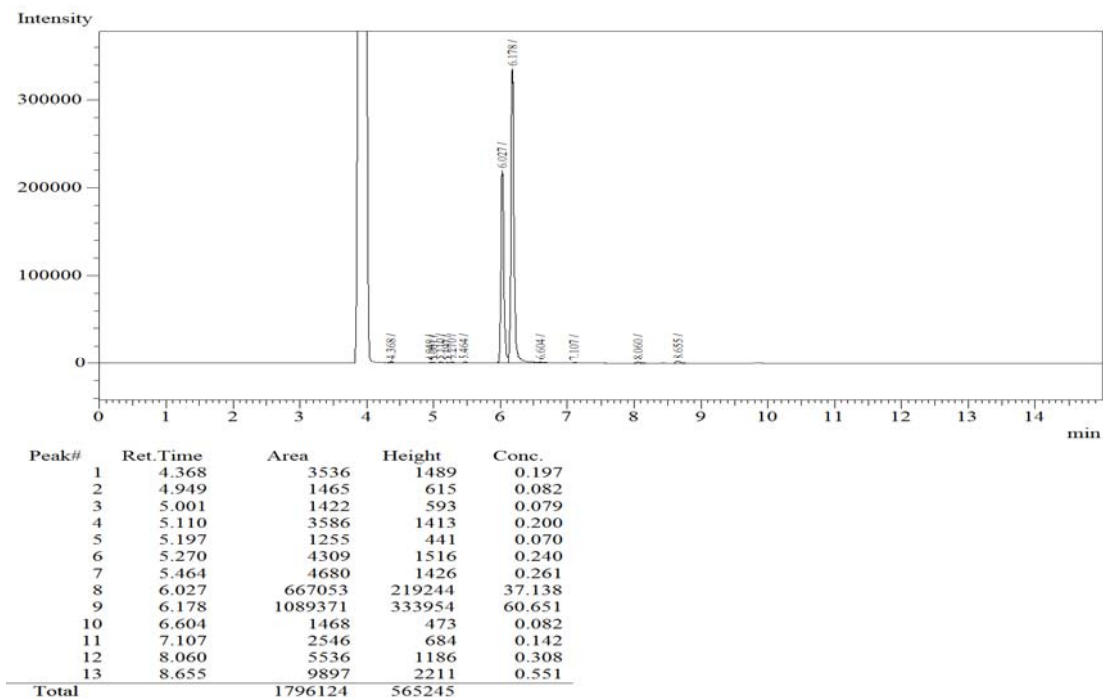

**Fig. S16** GC Chromatogram for entry 6 in **Table 6**

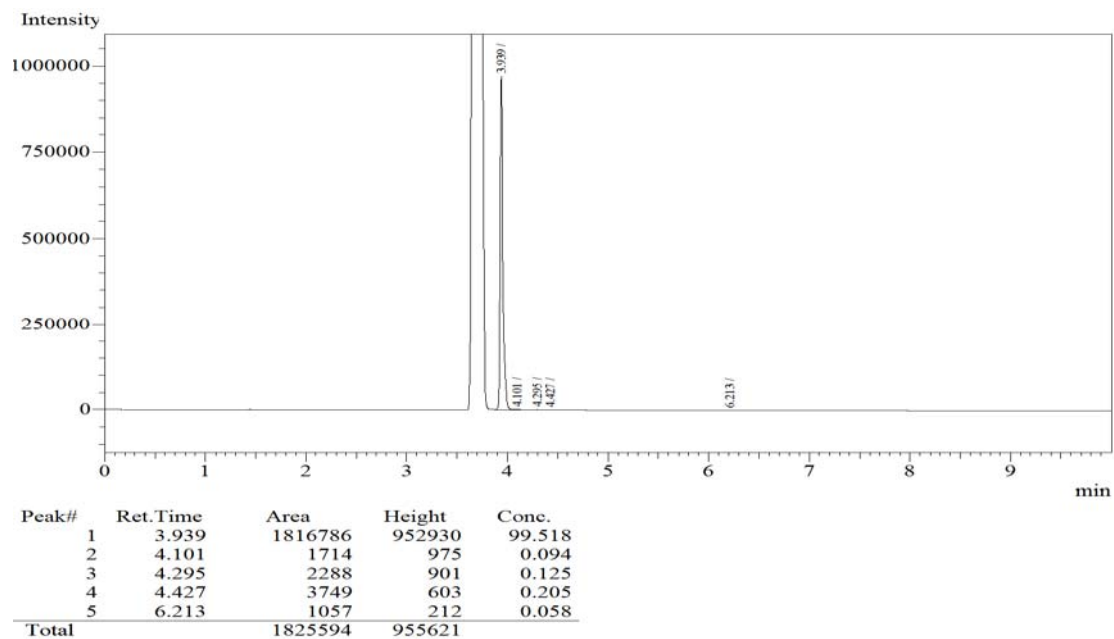

**Fig. S17** GC Chromatogram for entry 7 in **Table 6**

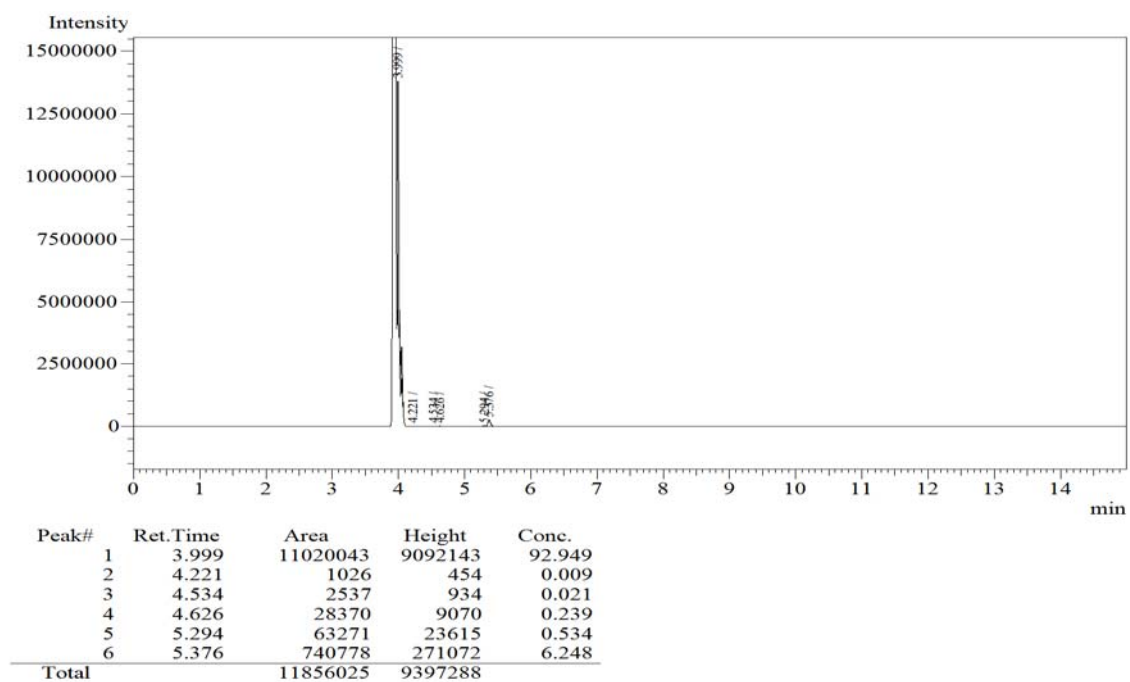

**Fig. S18** GC Chromatogram for entry 8 in **Table 6**

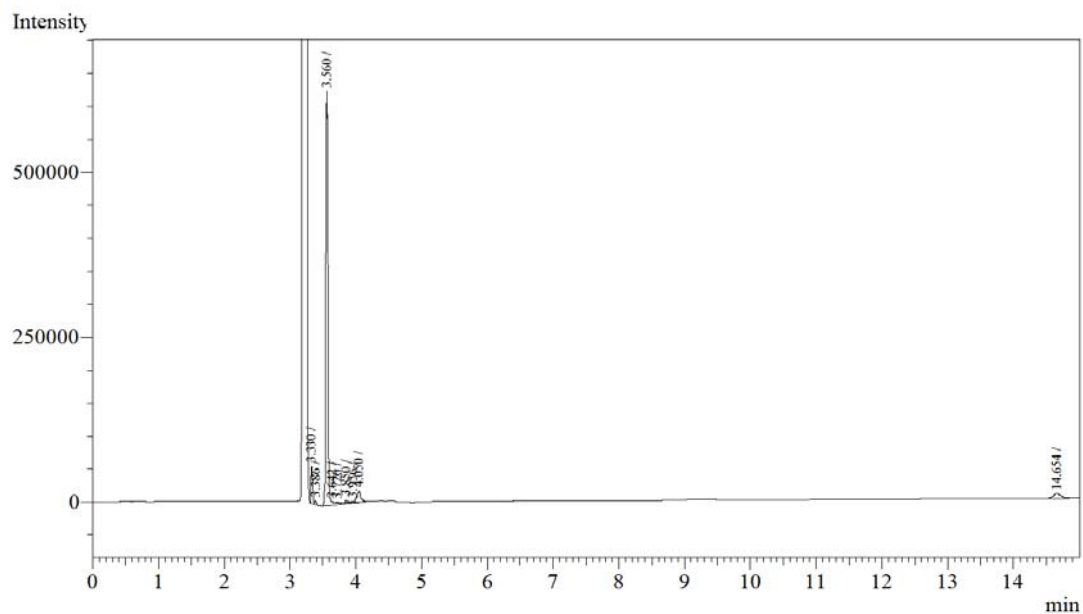

| Peak# | Ret.Time | Area    | Height | Conc.  |
|-------|----------|---------|--------|--------|
| 1     | 3.330    | 95379   | 55903  | 5.917  |
| 2     | 3.386    | 7200    | 4956   | 0.447  |
| 3     | 3.560    | 1361101 | 624429 | 84.437 |
| 4     | 3.642    | 1164    | 1048   | 0.072  |
| 5     | 3.720    | 2287    | 780    | 0.142  |
| 6     | 3.850    | 10984   | 3962   | 0.681  |
| 7     | 3.956    | 3702    | 1251   | 0.230  |
| 8     | 4.050    | 64310   | 16195  | 3.990  |
| 9     | 14.654   | 65843   | 7584   | 4.085  |
| Total |          | 1611970 | 716108 |        |

**Fig. S19** GC Chromatogram for entry 10 in **Table 6**

## II. GC conditions for oxidation of alcohols: (Table 6)

The GC conditions for monitoring oxidation of various primary and secondary alcohols are given below.

**Entry 1:** RTX-5 Column, 60 m × 0.32 mm, 230 °C; FID detector, 250 °C; Injector, 220 °C; Carrier Gas: N<sub>2</sub>; Rate: 1.42 mL/min.

**Entry 2:** RTX-5 Column, 60 m × 0.32 mm, 200 °C; FID detector, 220 °C; Injector, 190 °C; Carrier Gas: N<sub>2</sub>; Rate: 1.58 mL/min.

**Entry 3:** RTX-5 Column, 60 m × 0.32 mm, initial column temperature was increased from 250 to 275 °C at the rate of 2 °C/min; FID detector, 290 °C; Injector, 265 °C; Carrier Gas: N<sub>2</sub>; Rate: 1.37 mL/min.

**Entry 4:** RTX-5 Column, 60 m × 0.32 mm, 250 °C; FID detector, 280 °C; Injector, 250 °C; Carrier Gas: N<sub>2</sub>; Rate: 1.39 mL/min.

**Entry 5:** RTX-5 Column, 60 m × 0.32 mm, 210 °C; FID detector, 230 °C; Injector, 200 °C; Carrier Gas: N<sub>2</sub>; Rate: 1.44 mL/min.

**Entry 6:** RTX-5 Column, 60 m × 0.32 mm, 190 °C; FID detector, 210 °C; Injector, 180 °C; Carrier Gas: N<sub>2</sub>; Rate: 1.48 mL/min.

**Entry 7:** RTX-5 Column, 60 m × 0.32 mm, 210 °C; FID detector, 230 °C; Injector, 200 °C; Carrier Gas: N<sub>2</sub>; Rate: 1.56 mL/min.

**Entry 8:** RTX-5 Column, 60 m × 0.32 mm, 170 °C; FID detector, 190 °C; Injector, 160 °C; Carrier Gas: N<sub>2</sub>; Rate: 1.53 mL/min.

**Entry 9:** RTX-5 Column, 60 m × 0.32 mm, 170 °C; FID detector, 190 °C; Injector, 160 °C; Carrier Gas: N<sub>2</sub>; Rate: 1.53 mL/min.

**Entry 10:** RTX-5 Column, 60 m × 0.32 mm, 270 °C; FID detector, 290 °C; Injector, 260 °C; Carrier Gas: N<sub>2</sub>; Rate: 1.77 mL/min.

**Entry 11:** RTX-5 Column, 60 m × 0.32 mm, 160 °C; FID detector, 180 °C; Injector, 150 °C; Carrier Gas: N<sub>2</sub>; Rate: 2.00 mL/min.
